# Supplementary material for: Validation of the Japanese Version of the Burnout Assessment Tool
Source: PubMed Central journal article supplement (PMC7431961; doi:10.3389/fpsyg.2020.01819), 2020-08-11
Supplement: Data_Sheet_1.pdf [file Data_Sheet_1.pdf]

## Appendix

### Burnout Assessment Tool

#### **Instruction**

The following statements are related to your work situation and how you experience this situation. Please state how often each statement applied to you.

#### **Scoring**

1. Never                      2. Rarely                      3. Sometimes                      4. Often                      5. Always

#### **Items**

##### *Core symptoms*

---

##### *Exhaustion*

---

At work, I feel mentally exhausted

Everything I do at work requires a great deal of effort

After a day at work, I find it hard to recover my energy

At work, I feel physically exhausted

When I get up in the morning, I lack the energy to start a new day at work

I want to be active at work, but somehow I am unable to manage

When I exert myself at work, I quickly get tired

At the end of my working day, I feel mentally exhausted and drained

---

##### *Mental distance*

---

I struggle to find any enthusiasm for my work

At work, I do not think much about what I am doing and I function on autopilot

I feel a strong aversion towards my job

I feel indifferent about my job

I'm cynical about what my work means to others

---

##### *Cognitive impairment*

---

At work, I have trouble staying focused

At work I struggle to think clearly

I'm forgetful and distracted at work

When I'm working, I have trouble concentrating

I make mistakes in my work because I have my mind on other things

---

***Emotional impairment***

---

At work, I feel unable to control my emotions

I do not recognize myself in the way I react emotionally at work

During my work I become irritable when things don't go my way

I get upset or sad at work without knowing why

At work I may overreact unintentionally

---

***Secondary symptoms***

---

***Psychological complaints***

---

I have trouble falling or staying asleep

I tend to worry

I feel tense and stressed

I feel anxious and/or suffer from panic attacks

Noise and crowds disturb me

---

***Psychosomatic complaints***

---

I suffer from palpitations or chest pain

I suffer from stomach and/or intestinal complaints

I suffer from headaches

I suffer from muscle pain, for example in the neck, shoulder or back

I often get sick

---
